# Supplementary material for: Xylo-Oligosaccharides in Prevention of Hepatic Steatosis and Adipose Tissue Inflammation: Associating Taxonomic and Metabolomic Patterns in Fecal Microbiomes with Biclustering
Source: PubMed Central journal article supplement (PMC8068902; doi:10.3390/ijerph18084049), 2021-04-12
Supplement: ijerph-18-04049-s001.pdf [file ijerph-18-04049-s001.pdf]

**Table 1.** Average body and liver weights in each diet group. Effects of XOS and fat tested with UNIANOVA in IBM SPSS.

|                                | HFD             | HFD + XOS       | LFD             | LFD + XOS       | Fat effect                     | XOS effect | Interactive effect |
|--------------------------------|-----------------|-----------------|-----------------|-----------------|--------------------------------|------------|--------------------|
| <b>Body weight (g)</b>         | 510 ± 36        | 508 ± 29        | 414 ± 20        | 433 ± 26        | [F (1, 74775) = 92.1, p<0.001] | NS         | NS                 |
| <b>Liver weight (g)</b>        | 13.64 ± 1.14    | 13.48 ± 0.62    | 12.82 ± 0.82    | 12.83 ± 0.80    | [F (1, 5.009) = 6.7, p=0.014]  | NS         | NS                 |
| <b>Liver/body weight ratio</b> | 0.0277 ± 0.0021 | 0.0268 ± 0.0014 | 0.0311 ± 0.0019 | 0.0302 ± 0.0013 | [F (1, 0.000) = 47.5, p<0.001] | NS         | NS                 |

**Table S2.** The prediction performance of the classifier model for all diet groups (HFD, HFD + XOS, LFD, LFD + XOS), dietary fat (high, low) and XOS ingestion (true, false). Accuracy and f1 score for each run derived from 5-fold cross validation.

| <b>Average model accuracy-% and F1 scores from cross-validation. XGBoost classifier</b> |                     |                          |                            |
|-----------------------------------------------------------------------------------------|---------------------|--------------------------|----------------------------|
| <b>Only metabolites</b>                                                                 |                     |                          |                            |
|                                                                                         | <b>Diet group</b>   | <b>Fat content</b>       | <b>XOS supplementation</b> |
| <b>all biclusters</b>                                                                   | 42.5 +/- 12.7, 0.43 | <b>92.5 +/- 10, 0.92</b> | <b>60 +/- 9.4, 0.55</b>    |
| <b>SCFA bicluster</b>                                                                   | 50 +/- 11.2, 0.5    | <b>92.5 +/- 10, 0.92</b> | 57.5 +/- 15, 0.58          |
| <b>Product bicluster</b>                                                                | 32.5 +/- 15, 0.33   | 77.5 +/- 9.4, 0.78       | 35 +/- 14.6, 0.26          |
| <b>TMA bicluster</b>                                                                    | 27.5 +/- 14.6, 0.28 | 60 +/- 14.6, 0.61        | 47.5 +/- 14.6, 0.48        |
| <b>AA bicluster</b>                                                                     | 47.5 +/- 9.4, 0.48  | 75 +/- 7.9, 0.74         | <b>62.5 +/- 7.9, 0.62</b>  |
| <b>Isovalerate bicluster</b>                                                            | 37.5 +/- 7.9, 0.38  | <b>85 +/- 14.6, 0.85</b> | 52.5 +/- 18.4, 0.49        |
| <b>Only genera</b>                                                                      |                     |                          |                            |
|                                                                                         | <b>Diet group</b>   | <b>Fat content</b>       | <b>XOS supplementation</b> |
| <b>all biclusters</b>                                                                   | 50 +/- 17.7, 0.5    | <b>82.5 +/- 10, 0.83</b> | 42.5 +/- 12.7, 0.45        |
| <b>SCFA bicluster</b>                                                                   | 45 +/- 21.8, 0.45   | <b>87.5 +/- 0, 0.87</b>  | 40 +/- 18.4, 0.35          |
| <b>Product bicluster</b>                                                                | 45 +/- 12.7, 0.45   | <b>82.5 +/- 10, 0.79</b> | 40 +/- 9.4, 0.35           |
| <b>TMA bicluster</b>                                                                    | 37.5 +/- 13.7, 0.38 | 60 +/- 16.6, 0.58        | <b>60 +/- 16.6, 0.57</b>   |
| <b>AA bicluster</b>                                                                     | 30 +/- 17, 0.3      | 75 +/- 13.7, 0.63        | 45 +/- 15, 0.38            |
| <b>Isovalerate bicluster</b>                                                            | 37.5 +/- 13.7, 0.38 | <b>92.5 +/- 6.1, 0.9</b> | 40 +/- 5, 0.39             |
